# Supplementary material for: How does accelerometry-measured arm elevation at work influence prospective risk of long-term sickness absence?
Source: PubMed Central journal article supplement (PMC9045232; doi:10.5271/sjweh.4000), 2022-02-25
Supplement: SJWEH-48-137-S001.pdf [file SJWEH-48-137-S001.pdf]

## How does accelerometry-measured arm elevation at work influence prospective risk of long-term sickness absence?<sup>1</sup>

by Nidhi Gupta, PhD,<sup>2</sup> Charlotte Lund Rasmussen, PhD, Mikael Forsman, PhD, Karen Sjøgaard, PhD, Andreas Holtermann, PhD

1. APPENDICES
2. Correspondence to: Nidhi Gupta, National Research Centre for the Working Environment, Lerso Parkalle 105, DK-2100 Copenhagen, Denmark.  
[E-mail: ngu@nfa.dk]

Appendix A. An example showing how we compare the traditional cox analytics and compositional cox analytics in investigating the association between the worktime composition B and risk of long-term sickness absence. The worktime composition B contains worktime spent with arm elevation >60° in upright body position, arm elevation ≤60° in upright body position, and total non-upright body position.

| Analytical Steps                                      | Traditional Cox analytics                                                                                                                                                                                                                                                                                                                                                                                                                                                                                                                                                                                                        | Compositional Cox analytics                                                                                                                                                                                                                                                                                                                                                                                                                                                                                                                                                                                                                           |
|-------------------------------------------------------|----------------------------------------------------------------------------------------------------------------------------------------------------------------------------------------------------------------------------------------------------------------------------------------------------------------------------------------------------------------------------------------------------------------------------------------------------------------------------------------------------------------------------------------------------------------------------------------------------------------------------------|-------------------------------------------------------------------------------------------------------------------------------------------------------------------------------------------------------------------------------------------------------------------------------------------------------------------------------------------------------------------------------------------------------------------------------------------------------------------------------------------------------------------------------------------------------------------------------------------------------------------------------------------------------|
| Exposure definition (continuous variables in minutes) | Minutes spent on three exposures (i.e., arm elevation >60°, arm elevation ≤60°, and non-upright position) treated as three continuous independent exposures.                                                                                                                                                                                                                                                                                                                                                                                                                                                                     | These three exposures within a composition of worktime are transformed into isometric log-ratios (ilrs) resulting in two ilrs:<br><ol style="list-style-type: none"> <li>1. <math>ilr1_i = \sqrt{\frac{2}{3}} \ln \left( \frac{\text{Arm Elevation} &gt; 60^\circ (min)_i}{\sqrt{2 \sqrt{\text{Arm Elevation} \leq 60^\circ (min)_i \times \text{Non-upright position}(min)_i}}} \right)</math></li> <li>2. <math>ilr2_i = \sqrt{\frac{1}{2}} \ln \left( \frac{\text{Arm Elevation} \leq 60^\circ (min)_i}{\text{Non-upright position}_i} \right)</math></li> </ol> Where $i$ is one worker<br>The unit of the exposure is irrelevant to obtain ilrs. |
| Cox model                                             | $h_{LTSA}(t) = h_0(t) \exp(B_1 \text{arm elevation} \leq 60^\circ + B_2 \text{arm elevation} > 60^\circ + B_3 \text{non-upright position} + B_4 \text{age} + B_5 \text{sex} + B_6 \text{BMI} + B_7 \text{lift/carry} + B_8 \text{worktype})$ $\ln \left( \frac{h_{LTSA}(t)}{h_0(t)} \right) = B_1 \leq 60^\circ + B_2 > 60^\circ + B_3 \text{non-upright} + B_4 \text{age} + B_5 \text{sex} + B_6 \text{BMI} + B_7 \text{lift/carry} + B_8 \text{worktype}$ <p>Where<br/> <math>H_0</math>=baseline hazard where the three exposures are not present<br/> <math>B_1</math>-<math>B_3</math>=estimates of the three exposures</p> | $h_{LTSA}(t) = h_0(t) \exp(B_1 ilr_1 + B_2 ilr_2 + B_4 \text{age} + B_5 \text{sex} + B_6 \text{BMI} + B_7 \text{lift/carry} + B_8 \text{worktype})$ <p>So<br/> <math display="block">\ln \left( \frac{h_{LTSA}(t)}{h_0(t)} \right) = B_1 ilr_1 + B_2 ilr_2 + B_4 \text{age} + B_5 \text{sex} + B_6 \text{BMI} + B_7 \text{lift/carry} + B_8 \text{worktype}</math> <p>Where<br/> <math>H_0</math>=baseline hazard where exposures (“expressed as 2 ilrs”) are not present<br/> <math>B_1</math>-<math>B_2</math>=estimates of the two ilrs<br/> <math>B_4</math>-<math>B_8</math>=estimates of the confounders</p> </p>                               |

|                                     |                                                                                                                                                                                                                                                                                                                                                                                                                                                                                                                                                                                                                                                | B <sub>4</sub> -B <sub>8</sub> =estimates of the confounders |                                                                                                                                                                                                                                                                                                                                                                                                                                                                                                                                                                                                                                                                                                                                                                                                                                                                                                                                                                                                                                                                                                                                                                                                                                                                      |                         |       |                  |
|-------------------------------------|------------------------------------------------------------------------------------------------------------------------------------------------------------------------------------------------------------------------------------------------------------------------------------------------------------------------------------------------------------------------------------------------------------------------------------------------------------------------------------------------------------------------------------------------------------------------------------------------------------------------------------------------|--------------------------------------------------------------|----------------------------------------------------------------------------------------------------------------------------------------------------------------------------------------------------------------------------------------------------------------------------------------------------------------------------------------------------------------------------------------------------------------------------------------------------------------------------------------------------------------------------------------------------------------------------------------------------------------------------------------------------------------------------------------------------------------------------------------------------------------------------------------------------------------------------------------------------------------------------------------------------------------------------------------------------------------------------------------------------------------------------------------------------------------------------------------------------------------------------------------------------------------------------------------------------------------------------------------------------------------------|-------------------------|-------|------------------|
| Results of Cox estimates            | variables                                                                                                                                                                                                                                                                                                                                                                                                                                                                                                                                                                                                                                      | HR and 95%CI                                                 | Variables                                                                                                                                                                                                                                                                                                                                                                                                                                                                                                                                                                                                                                                                                                                                                                                                                                                                                                                                                                                                                                                                                                                                                                                                                                                            | B (95%CI)               | SE(B) | HR               |
|                                     | Arm elevation ≤60°                                                                                                                                                                                                                                                                                                                                                                                                                                                                                                                                                                                                                             | 0.999 (0.997—1.001)                                          | llr <sub>1</sub>                                                                                                                                                                                                                                                                                                                                                                                                                                                                                                                                                                                                                                                                                                                                                                                                                                                                                                                                                                                                                                                                                                                                                                                                                                                     | 0.3227 (0.052—0.593)    | 0.138 | 1.38 (1.05—1.81) |
|                                     | Arm Elevation >60°                                                                                                                                                                                                                                                                                                                                                                                                                                                                                                                                                                                                                             | 1.003(0.998-1.008)                                           | llr <sub>2</sub>                                                                                                                                                                                                                                                                                                                                                                                                                                                                                                                                                                                                                                                                                                                                                                                                                                                                                                                                                                                                                                                                                                                                                                                                                                                     | -0.353 (-0.638— -0.068) | 0.145 | 0.70 (0.53—0.93) |
|                                     | Total Non-upright position                                                                                                                                                                                                                                                                                                                                                                                                                                                                                                                                                                                                                     | 1.0003 (0.998—1.002)                                         |                                                                                                                                                                                                                                                                                                                                                                                                                                                                                                                                                                                                                                                                                                                                                                                                                                                                                                                                                                                                                                                                                                                                                                                                                                                                      |                         |       |                  |
| Interpretation of the Cox estimates | <p>This analysis gives three HR estimates, one for each exposure (time spent with arm elevation &gt;60° in upright position, arm elevation ≤60° in upright position, and total time spent on non-upright position). For one of the exposures (i.e. time spent with arm elevation &gt;60° in upright position), the interpretation of the Cox HR estimates will be: per minute increase in time spent with arm elevation &gt;60°, the risk of LTSA increases by 0.3%.</p> <p>Please note that these estimates are based on continuous exposures in “minutes” and not in “hours” (this is why the HRs might seem small with a narrow 95%CI).</p> |                                                              | <p>This analysis gives two HR estimates instead of three like in traditional analytics. This is because, in the compositional analytics, the exposures are two isometric log-ratios instead of the three exposures (time spent with arm elevation &gt;60° in upright position, arm elevation ≤60° in upright position, and total time spent on non-upright position) like in the traditional analytics.</p> <p>Example of how to interpret one of the ilr<sub>1</sub>-based HR: One unit increase in a log of worktime spent with arm elevation &gt;60° in upright position relative to arm elevation ≤60° in upright position and total non-upright position increases LTSA risk by 38%.</p> <p>Because we cannot interpret what is ‘one unit of log’, it is difficult to interpret the HR estimates. Thus, we did the following: we first determined the sample average of Composition B (shown in bold in the table below). From this average composition, We then determined the new theoretical compositions by reallocating a fixed amount of time from one part to another part of the composition, so that the total average composition time is kept constant. This way, we determined nine theoretical compositions that are shown in the Table below.</p> |                         |       |                  |

| Number of compositions     | Reallocation (mins) | Arm elevation >60° (mins) | Arm elevation ≤60° (mins) | Non-upright (mins) | Ilr <sub>1</sub> | Ilr <sub>2</sub> |
|----------------------------|---------------------|---------------------------|---------------------------|--------------------|------------------|------------------|
| 1                          | -2.0                | 14.7                      | 287.3                     | 155                | -2.171           | 0.442            |
| 2                          | -1.5                | 15.2                      | 286.8                     | 155                | -2.143           | 0.441            |
| 3                          | -1.0                | 15.7                      | 286.3                     | 155                | -2.116           | 0.440            |
| 4                          | -0.5                | 16.2                      | 285.8                     | 155                | -2.09            | 0.438            |
| <b>Average composition</b> | <b>0</b>            | <b>16.7</b>               | <b>285.3</b>              | <b>155</b>         | <b>-2.065</b>    | <b>0.437</b>     |
| 6                          | 0.5                 | 17.2                      | 284.8                     | 155                | -2.04            | 0.436            |
| 7                          | 1.0                 | 17.7                      | 284.3                     | 155                | -2.016           | 0.435            |
| 8                          | 1.5                 | 18.2                      | 283.8                     | 155                | -1.992           | 0.433            |
| 9                          | 2.0                 | 18.7                      | 283.3                     | 155                | -1.970           | 0.432            |

Using the cox model estimates (the two ilrs-HRs shown above), we predicted the hazard ratios that indicated what would be the LTSA risk if workers had one of the 9 new theoretical compositions compared to the sample average composition using the following formula:

$$HR = \exp[\hat{\beta}_1(x - \bar{x}) + \hat{\beta}_2(y - \bar{y})]$$

Where

HR = predicted hazard ratio

$x$  and  $y$  = new theoretical ilrs (shown in the table above)

$\bar{x}$  and  $\bar{y}$  = average ilrs (row 5 in the table above)

$\hat{\beta}_1$  and  $\hat{\beta}_2$  = parameter estimates for ilr<sub>1</sub> and ilr<sub>2</sub>, respectively

We calculated the 95%CI of this HR using the following formula:

$$\exp\left[\hat{\beta}_1(x - \bar{x}) + \hat{\beta}_2(y - \bar{y}) \pm 1.96 \times \sqrt{(x - \bar{x})^2 Var(\hat{\beta}_1) + (y - \bar{y})^2 Var(\hat{\beta}_2) + 2 \times (x - \bar{x})(y - \bar{y}) Cov(\hat{\beta}_1, \hat{\beta}_2)}\right]$$

where

Var=variance

Cov=covariance

We give below an example of how we calculated these HR and its 95%CI:

1. *Average composition calculation and corresponding ilrs*

16.7 minutes arm elevation in upright position  $>60^\circ$ , 285.3 minutes arm elevation  $\leq 60^\circ$  in upright position and 155 minutes on non-upright position, translated to

$$Ilr_1 = -2.064506(x \text{ in formula above})$$

$$Ilr_2 = 0.4372112(y \text{ in formula above})$$

2. *New theoretical composition calculation using 2 minutes reallocation*

14.7 minutes arm elevation in upright position  $>60^\circ$ , 287.3 minutes arm elevation  $\leq 60^\circ$  in upright position and 155 minutes on non-upright position translated to

$$\text{Average } ilr_1 = -2.171144 (\bar{x})$$

$$\text{Average } ilr_2 = 0.4421373 (\bar{y})$$

3. *Calculate HR using the formula written above*

$$HR = \exp[0.3227719(-2.171144 - -2.064506) + -0.3528727(0.4421373 - 0.4372112)] \quad HR=0.964$$

4. *calculate 95%CI of the HR using the formula given above*

Given that

$$\text{cov}(\hat{\beta}_1, \hat{\beta}_2) = -0.01414071$$

$$\text{Var}(\hat{\beta}_1) = 0.01906124$$

$$\text{Var}(\hat{\beta}_2) = 0.02111989$$

$$\exp \left[ 0.3227719(-2.171144 - -2.064506) + -0.3528727(0.4421373 - 0.4372112) \right]$$

$$\pm 1.96 \times \sqrt{ \begin{matrix} (-2.171144 - -2.064506)^2 0.01906124 + \\ (0.4421373 - 0.4372112)^2 0.02111989 + \\ 2 \times (-2.171144 - -2.064506)(0.4421373 - 0.4372112) - 0.01414071 \end{matrix} }$$

**Resulting 95%CI = 0.936-0.994**

The reason behind why we have such a narrow confidence interval of the HR is because this confidence interval corresponds to a very small difference of only 2 minutes between the new theoretical composition and the average composition  $(-2.171144 - -2.064506) = -0.107$ . Had it been the corresponding difference of 16 minutes, the 95%CI confidence interval of the HR would have been 0.22-0.87.

Appendix B. Resulting estimates of the Cox Proportional Hazard models to investigate the association between each composition (A, B, or C) of worktime spent on elevated arm work and risk of long-term sickness absence.

|                                                                                                                                              | Variables        | B      | SE(B) | P     |
|----------------------------------------------------------------------------------------------------------------------------------------------|------------------|--------|-------|-------|
| Composition A: arm elevation >30° in upright body position, arm elevation ≤30° in upright body position, and total non-upright body position |                  |        |       |       |
| Crude                                                                                                                                        | llr <sub>1</sub> | 0.401  | 0.180 | 0.03  |
|                                                                                                                                              | llr <sub>2</sub> | -0.282 | 0.146 | 0.05  |
| Fully adjusted                                                                                                                               | llr <sub>1</sub> | 0.383  | 0.186 | 0.04  |
|                                                                                                                                              | llr <sub>2</sub> | -0.369 | 0.151 | 0.01  |
| Composition B: Arm elevation >60° in upright body position, arm elevation ≤60° in upright body position, and total non-upright body position |                  |        |       |       |
| Crude                                                                                                                                        | llr <sub>1</sub> | 0.316  | 0.132 | 0.02  |
|                                                                                                                                              | llr <sub>2</sub> | -0.252 | 0.138 | 0.07  |
| Fully adjusted                                                                                                                               | llr <sub>1</sub> | 0.3227 | 0.138 | 0.02  |
|                                                                                                                                              | llr <sub>2</sub> | -0.353 | 0.145 | 0.02  |
| Composition C: Arm elevation >90° in upright body position, arm elevation ≤90° in upright body position, and total non-upright body position |                  |        |       |       |
| Crude                                                                                                                                        | llr <sub>1</sub> | 0.304  | 0.104 | 0.004 |
|                                                                                                                                              | llr <sub>2</sub> | -0.266 | 0.129 | 0.04  |
| Fully adjusted                                                                                                                               | llr <sub>1</sub> | 0.310  | 0.107 | 0.004 |
|                                                                                                                                              | llr <sub>2</sub> | -0.361 | 0.134 | 0.007 |

Crude: models adjusted for age and sex, fully adjusted: models adjusted for age, sex, body mass index, work time spent with lifting/carrying, and type of work (blue-collar or white-collar).

Appendix C. Results of the prediction method to interpret IIR-based effect sizes obtained from Cox Proportional Hazard Models in terms of change in LTSA risk corresponding to the theoretical change in minutes of work time composition A (arm elevation >30° in upright position, arm elevation ≤30° in upright position and total non-upright position), B (arm elevation >60° in upright position, arm elevation ≤60° in upright position and total non-upright position) and C (in upright position with arm elevation >90°, in upright position with arm elevation ≤90° and total non-upright position)

| Number of reallocated composition | Change in composition (mins) | Reallocated composition (mins) |                    |             | Worktime (mins) | 95%CI Low    | Hazard ratio | 95%CI high   |
|-----------------------------------|------------------------------|--------------------------------|--------------------|-------------|-----------------|--------------|--------------|--------------|
| <b>Composition A</b>              |                              |                                |                    |             |                 |              |              |              |
|                                   |                              | Arm elevation >30°             | Arm elevation ≤30° | Non-upright |                 |              |              |              |
| <b>First Set</b>                  |                              |                                |                    |             |                 |              |              |              |
| 1                                 | -2.0                         | 92.2                           | 209.8              | 155         | 457             | 0.980        | 0.989        | 0.999        |
| 2                                 | -1.5                         | 92.7                           | 209.3              | 155         | 457             | 0.985        | 0.992        | 0.999        |
| 3                                 | -1.0                         | 93.2                           | 208.8              | 155         | 457             | 0.990        | 0.995        | 0.999        |
| 4                                 | -0.5                         | 93.7                           | 208.3              | 155         | 457             | 0.995        | 0.997        | 1.000        |
| <b>Reference</b>                  | <b>0</b>                     | <b>94.2</b>                    | <b>207.8</b>       | <b>155</b>  | <b>457</b>      | <b>1.000</b> | <b>1.000</b> | <b>1.000</b> |
| 6                                 | 0.5                          | 94.7                           | 207.3              | 155         | 457             | 1.000        | 1.003        | 1.005        |
| 7                                 | 1.0                          | 95.2                           | 206.8              | 155         | 457             | 1.001        | 1.005        | 1.010        |
| 8                                 | 1.5                          | 95.7                           | 206.3              | 155         | 457             | 1.001        | 1.008        | 1.015        |
| 9                                 | 2.0                          | 96.2                           | 205.8              | 155         | 457             | 1.001        | 1.011        | 1.020        |
| <b>Second Set</b>                 |                              |                                |                    |             |                 |              |              |              |
| <b>Reference</b>                  | <b>0</b>                     | <b>24.1</b>                    | <b>277.9</b>       | <b>155</b>  | <b>457</b>      | <b>1.000</b> | <b>1.000</b> | <b>1.000</b> |
| 1                                 | 20                           | 44.1                           | 257.9              | 155         | 457             | 1.018        | 1.247        | 1.528        |
| 2                                 | 40                           | 64.2                           | 237.8              | 155         | 457             | 1.032        | 1.450        | 2.036        |
| 3                                 | 50                           | 74.2                           | 227.8              | 155         | 457             | 1.039        | 1.545        | 2.295        |
| 4                                 | 60                           | 84.2                           | 217.8              | 155         | 457             | 1.047        | 1.637        | 2.562        |
| 5                                 | 70                           | 94.2                           | 207.8              | 155         | 457             | 1.054        | 1.730        | 2.840        |
| 6                                 | 80                           | 104.2                          | 197.8              | 155         | 457             | 1.061        | 1.823        | 3.131        |
| 7                                 | 90                           | 114.2                          | 187.8              | 155         | 457             | 1.068        | 1.917        | 3.440        |
| 8                                 | 100                          | 124.3                          | 177.7              | 155         | 457             | 1.076        | 2.013        | 3.769        |
| 9                                 | 120                          | 144.3                          | 157.7              | 155         | 457             | 1.092        | 2.218        | 4.506        |
| 10                                | 140                          | 164.3                          | 137.7              | 155         | 457             | 1.109        | 2.445        | 5.389        |
| <b>Composition B</b>              |                              |                                |                    |             |                 |              |              |              |
|                                   |                              | Arm elevation >60°             | Arm elevation ≤60° | Non-upright |                 |              |              |              |
| <b>First Set</b>                  |                              |                                |                    |             |                 |              |              |              |
| 1                                 | -2.0                         | 14.7                           | 287.3              | 155         | 457             | 0.936        | 0.964        | 0.994        |
| 2                                 | -1.5                         | 15.2                           | 286.8              | 155         | 457             | 0.952        | 0.974        | 0.995        |
| 3                                 | -1.0                         | 15.7                           | 286.3              | 155         | 457             | 0.968        | 0.983        | 0.997        |
| 4                                 | -0.5                         | 16.2                           | 285.8              | 155         | 457             | 0.984        | 0.991        | 0.998        |
| <b>Reference</b>                  | <b>0</b>                     | <b>16.7</b>                    | <b>285.3</b>       | <b>155</b>  | <b>457</b>      | <b>1.000</b> | <b>1.000</b> | <b>1.000</b> |

|                      |          |                       |                       |            |                 |              |              |              |
|----------------------|----------|-----------------------|-----------------------|------------|-----------------|--------------|--------------|--------------|
| 6                    | 0.5      | 17.2                  | 284.8                 | 155        | 457             | 1.001        | 1.008        | 1.015        |
| 7                    | 1.0      | 17.7                  | 284.3                 | 155        | 457             | 1.003        | 1.017        | 1.031        |
| 8                    | 1.5      | 18.2                  | 283.8                 | 155        | 457             | 1.004        | 1.025        | 1.046        |
| 9                    | 2.0      | 18.7                  | 283.3                 | 155        | 457             | 1.006        | 1.033        | 1.061        |
| <b>Second Set</b>    |          |                       |                       |            |                 |              |              |              |
| <b>Reference</b>     | <b>0</b> | <b>3</b>              | <b>299</b>            | <b>155</b> | <b>457</b>      | <b>1.000</b> | <b>1.000</b> | <b>1.000</b> |
| 2                    | 4        | 7                     | 295                   | 155        | 457             | 1.041        | 1.273        | 1.558        |
| 3                    | 9        | 12                    | 290                   | 155        | 457             | 1.068        | 1.483        | 2.059        |
| 4                    | 14       | 17                    | 285                   | 155        | 457             | 1.087        | 1.639        | 2.472        |
| 5                    | 19       | 22                    | 280                   | 155        | 457             | 1.101        | 1.768        | 2.837        |
| 6                    | 24       | 27                    | 275                   | 155        | 457             | 1.113        | 1.879        | 3.172        |
| 7                    | 29       | 32                    | 270                   | 155        | 457             | 1.124        | 1.980        | 3.487        |
| 8                    | 34       | 37                    | 265                   | 155        | 457             | 1.134        | 2.072        | 3.788        |
| 9                    | 39       | 42                    | 260                   | 155        | 457             | 1.143        | 2.159        | 4.078        |
| 10                   | 44       | 47                    | 255                   | 155        | 457             | 1.151        | 2.241        | 4.362        |
| <b>Composition C</b> |          |                       |                       |            |                 |              |              |              |
|                      |          | Arm elevation<br>>90° | Arm elevation<br>≤90° |            | Non-<br>upright |              |              |              |
| <b>First Set</b>     |          |                       |                       |            |                 |              |              |              |
| 1                    | -2.0     | 1.0                   | 301.0                 | 155        |                 | 0.624        | 0.754        | 0.912        |
| 2                    | -1.5     | 1.5                   | 300.5                 | 155        |                 | 0.742        | 0.837        | 0.943        |
| 3                    | -1.0     | 2.0                   | 300.0                 | 155        |                 | 0.840        | 0.901        | 0.966        |
| 4                    | -0.5     | 2.5                   | 299.5                 | 155        |                 | 0.924        | 0.954        | 0.985        |
| <b>Reference</b>     | <b>0</b> | <b>3.0</b>            | <b>299.0</b>          | <b>155</b> |                 | <b>1.000</b> | <b>1.000</b> | <b>1.000</b> |
| 6                    | 0.5      | 3.5                   | 298.5                 | 155        |                 | 1.013        | 1.041        | 1.069        |
| 7                    | 1.0      | 4.0                   | 298.0                 | 155        |                 | 1.025        | 1.077        | 1.132        |
| 8                    | 1.5      | 4.5                   | 297.5                 | 155        |                 | 1.035        | 1.111        | 1.192        |
| 9                    | 2.0      | 5.0                   | 297.0                 | 155        |                 | 1.044        | 1.141        | 1.247        |
| <b>Second Set</b>    |          |                       |                       |            |                 |              |              |              |
| <b>Reference</b>     | <b>0</b> | <b>&lt;1</b>          | <b>302</b>            | <b>155</b> |                 | <b>1.000</b> | <b>1.000</b> | <b>1.000</b> |
| 2                    | 2        | 2                     | 300                   | 155        |                 | 1.123        | 1.428        | 1.815        |
| 3                    | 3        | 3                     | 299                   | 155        |                 | 1.162        | 1.585        | 2.161        |
| 4                    | 3        | 3                     | 299                   | 155        |                 | 1.162        | 1.585        | 2.161        |
| 5                    | 4        | 4                     | 298                   | 155        |                 | 1.191        | 1.707        | 2.447        |
| 6                    | 6        | 6                     | 296                   | 155        |                 | 1.233        | 1.897        | 2.919        |
| 7                    | 8        | 8                     | 294                   | 155        |                 | 1.264        | 2.046        | 3.311        |
| 8                    | 10       | 10                    | 292                   | 155        |                 | 1.289        | 2.171        | 3.654        |
| 9                    | 12       | 12                    | 290                   | 155        |                 | 1.311        | 2.279        | 3.964        |

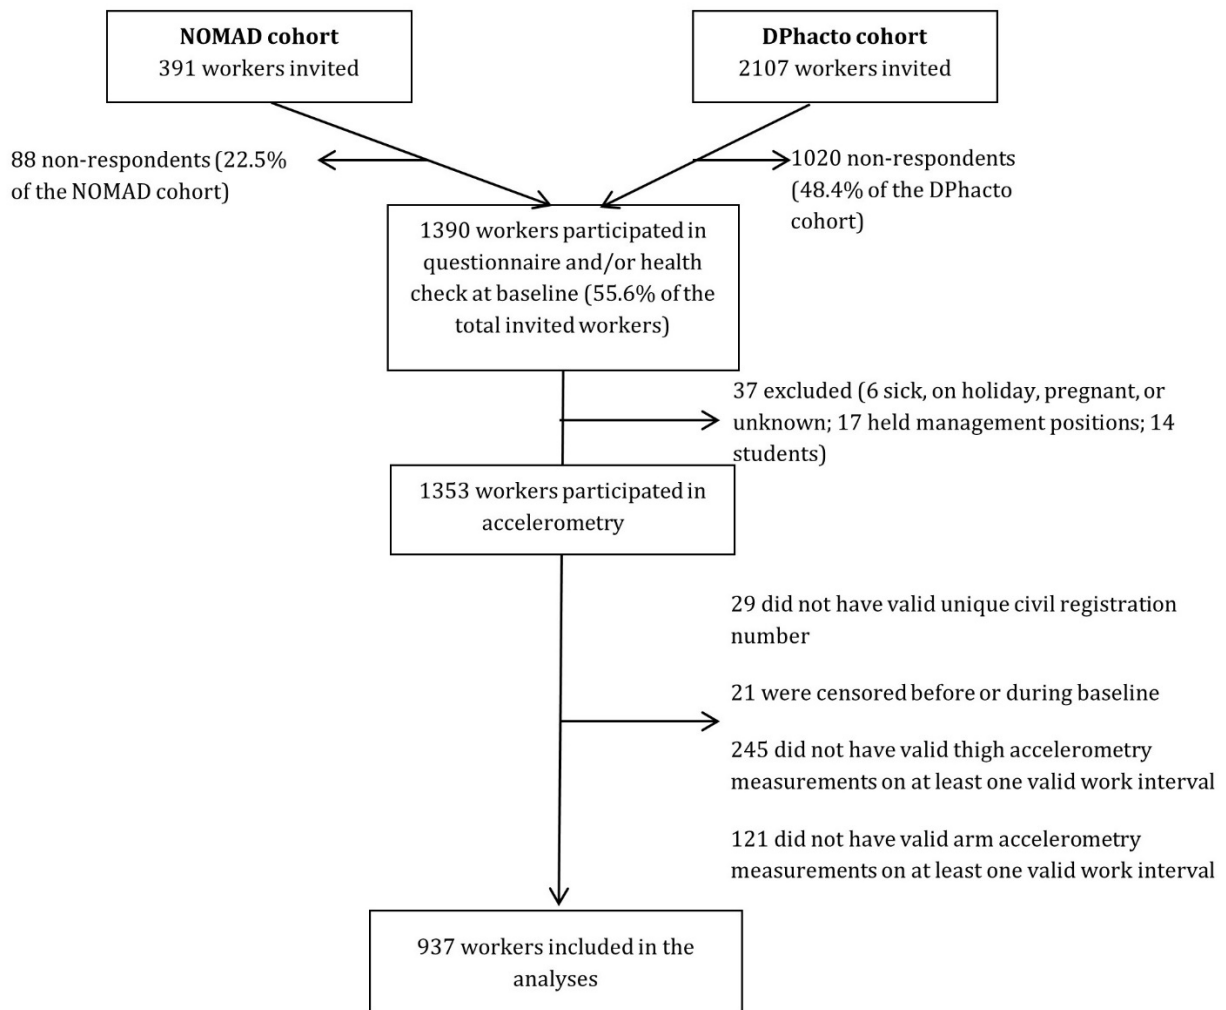



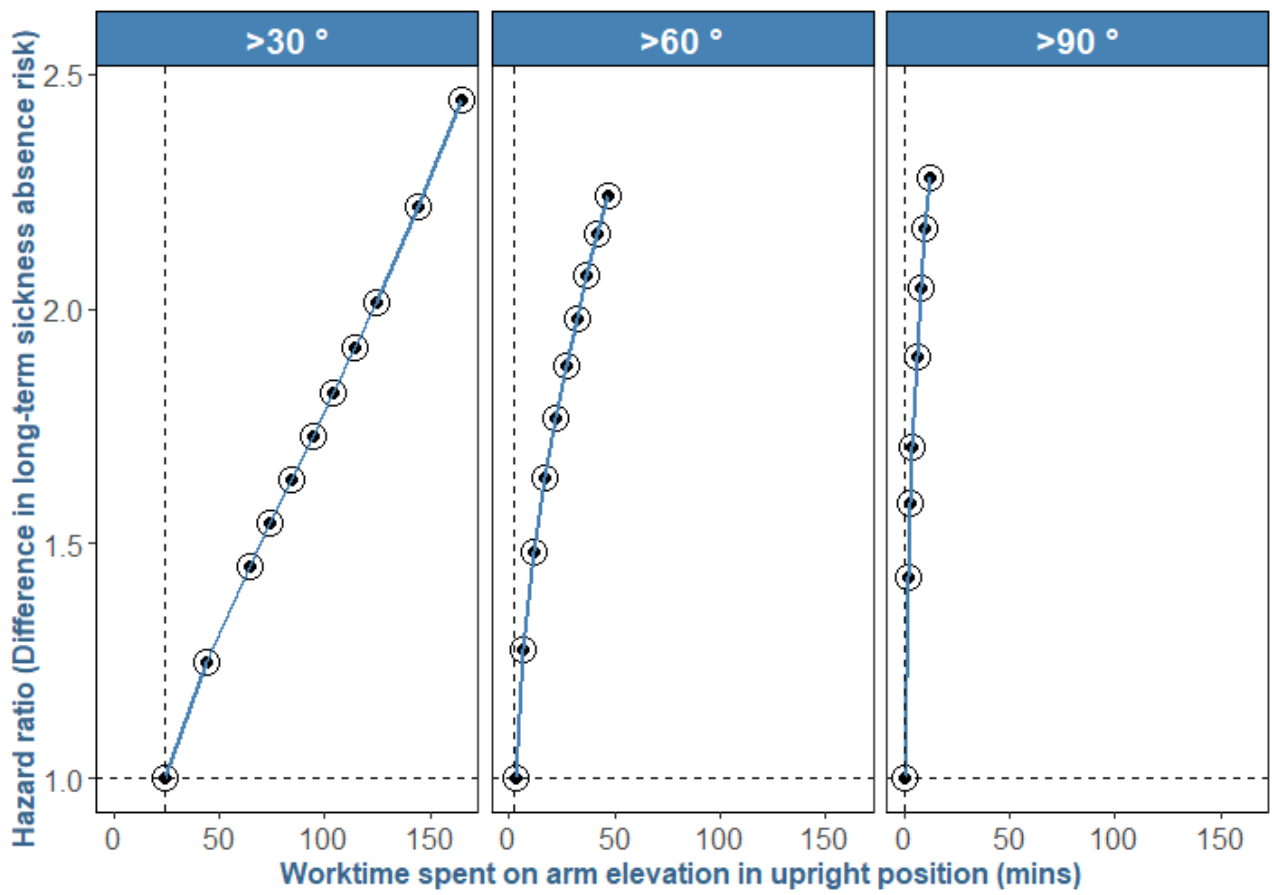

Appendix F. Results of the comparison between the three sensitivity analyses and main analyses investigating the association between the composition of work time spent with arm elevation and risk of long-term sickness absence. These three analyses were (1) analyzing the arm elevation during the whole work time –i.e., both during upright and non-upright body positions- instead of arm elevation in only upright body position, (2) adjusting for the potential confounding effect of influence at work compared to not adjusting for it, and (3) removing workers from the analysis who had a pre-event of LTSA compared to not removing them.

| Type of analyses                                                                                                                                                            | n   | Main analyses                                                                                                        | n   | Sensitivity analyses                                                                                                  |
|-----------------------------------------------------------------------------------------------------------------------------------------------------------------------------|-----|----------------------------------------------------------------------------------------------------------------------|-----|-----------------------------------------------------------------------------------------------------------------------|
| 1. analyzing the arm elevation during the whole work time –i.e., both during upright and non-upright body positions- instead of arm elevation in only upright body position | 937 | Compostion A*: LR Chisq=6.0, P=0.05<br>Composition B*: LR Chisq=6.6, P=0.04<br>Composition C*: LR Chisq=9.9, P=0.007 | 937 | Compostion A**: LR Chisq=9.2, P=0.002<br>Compostion B**: LR Chisq=4.4, P=0.04<br>Compostion C**: LR Chisq=2.1, P=0.15 |
| 2. Adjusting/not adjusting for the potential confounding effect of influence at work                                                                                        | 733 | Compostion A*: LR Chisq=6.0, P=0.05<br>Composition B*: LR Chisq=6.5, P=0.04<br>Composition C*: LR Chisq=9.7, P=0.01  | 733 | Compostion A*: LR Chisq=5.5, P=0.06<br>Compostion B*: LR Chisq=5.5, P=0.06<br>CompostionC*: LR Chisq =8.6, P=0.01     |
| 3. Removing/not removing workers with pre event of LTSA                                                                                                                     | 937 | Compostion A*: LR Chisq=6.0, P=0.05<br>Composition B*: LR Chisq=6.6, P=0.04<br>Composition C*: LR Chisq=9.9, P=0.01  | 880 | Compostion A*: LR Chisq=5.3, P=0.07<br>Compostion B*: LR Chisq=6.1, P=0.05<br>Compostion C*: LR Chisq=6.9, P=0.03     |

LR Chisq= Likelihood ratio chi-square statistics obtained from the cox model; \*Composition A = arm elevation  $>30^\circ$  in upright body position, arm elevation  $\leq 30^\circ$  in upright body position, and non-upright body position (Figure 1A); \*Composition B= arm elevation  $>60^\circ$  in upright body position, arm elevation  $\leq 60^\circ$  in upright body position, and non-upright body position (Figure 1B); and \*Composition C= arm elevation  $>90^\circ$  in upright body position, arm elevation  $\leq 90^\circ$  in upright body position, and non-upright body position (Figure 1C); \*\* Composition A = arm elevation  $>30^\circ$  during whole work time, arm elevation  $\leq 30^\circ$  during the whole worktime; \*\* Composition B= arm elevation  $>60^\circ$  during the whole worktime, arm elevation  $\leq 60^\circ$  during the whole worktime, and \*\* Composition C= arm elevation  $>90^\circ$  during the whole worktime, arm elevation  $\leq 90^\circ$  during the whole worktime.

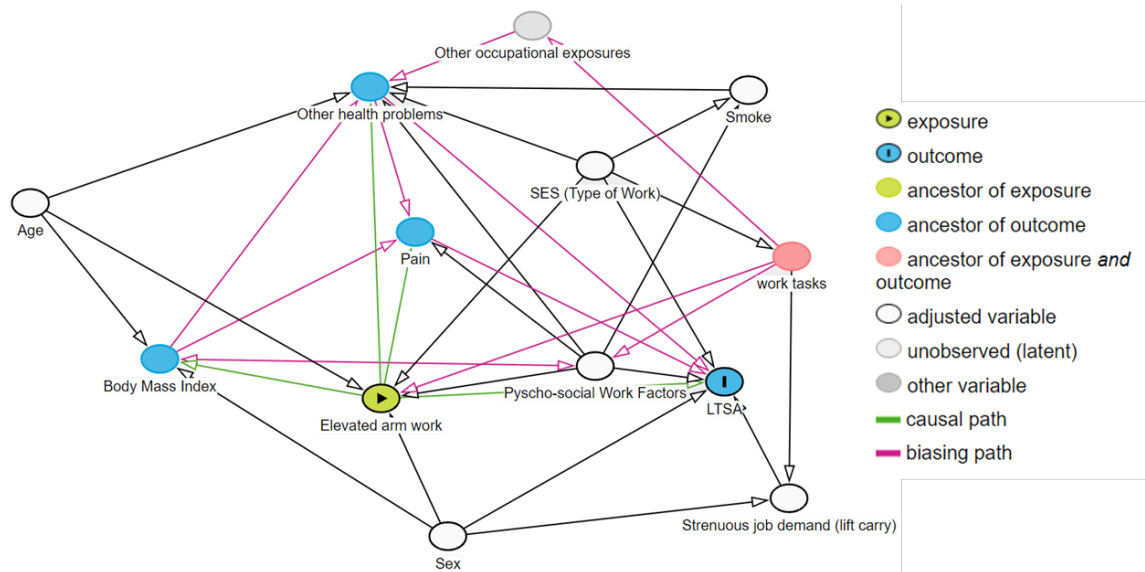

Appendix G. Directed acyclic graph indicating the potential confounders that needed to be adjusted for when investigating the association between worktime spent on elevated arm work and risk of long-term sickness absence (LTSA).

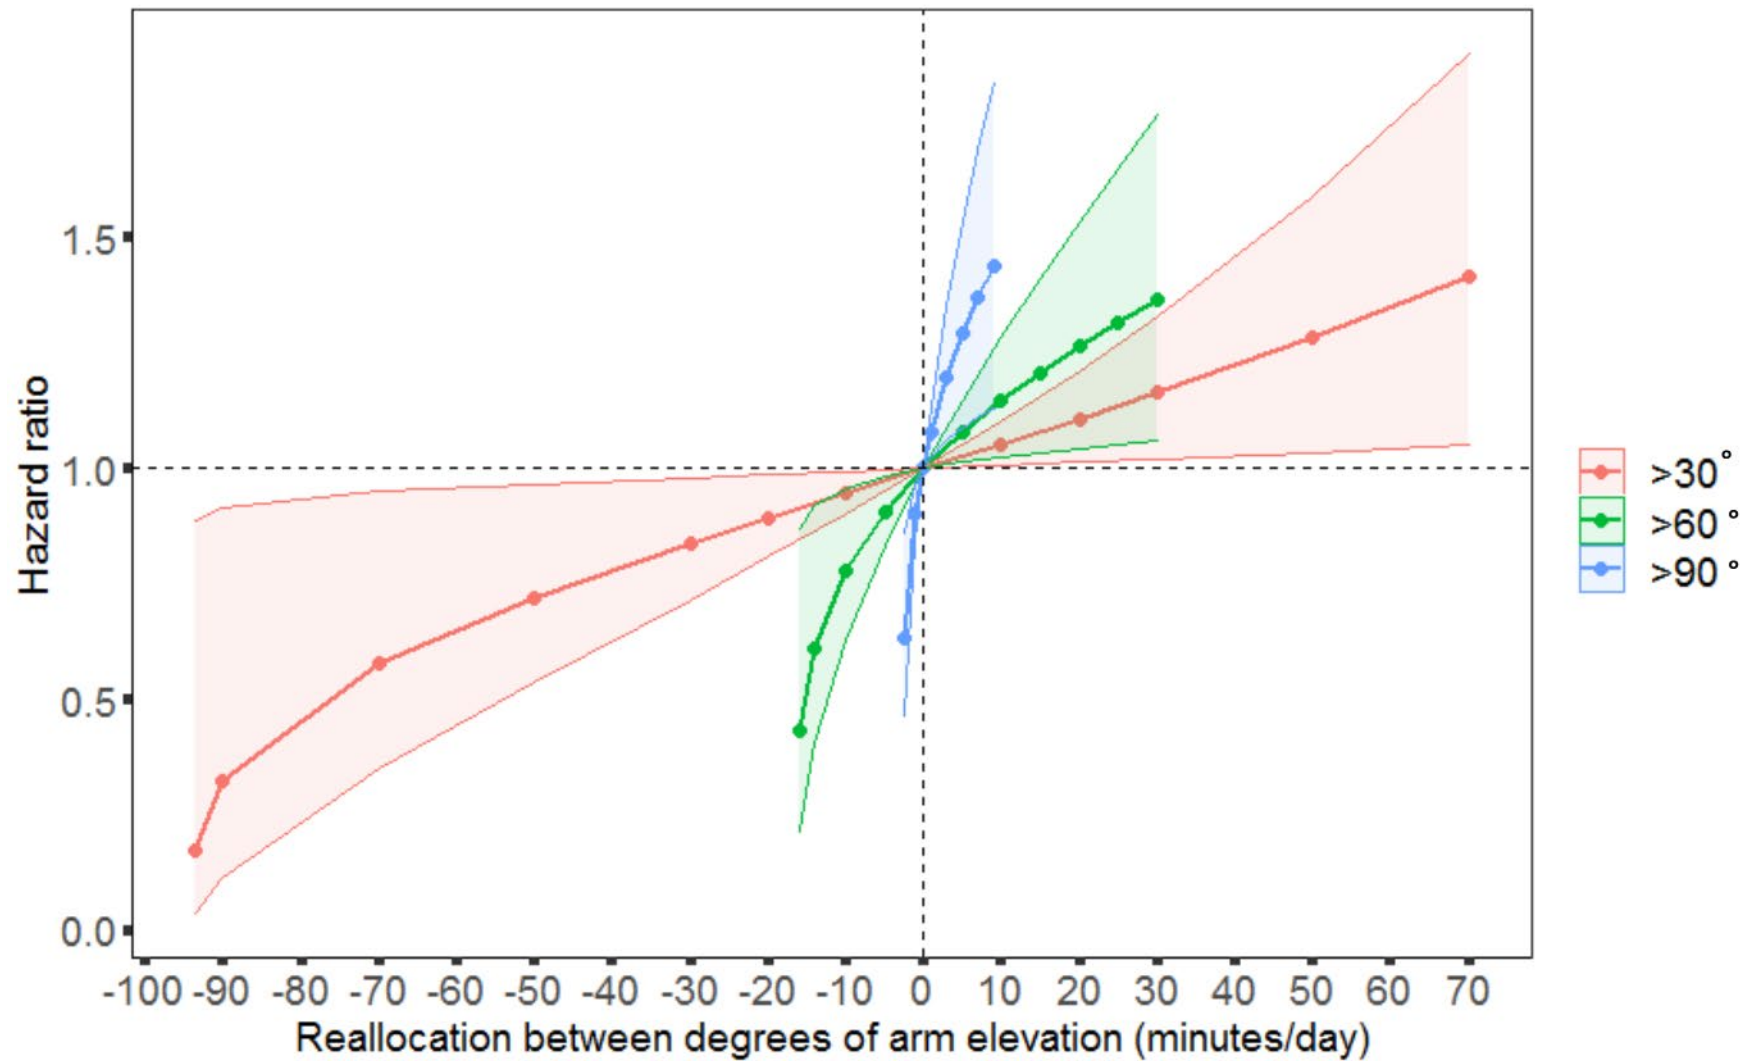

Appendix H. The direction and strength of the association between work time spent with arm elevation >30°, >60° and >90° in upright position, relative to work time spent with arm elevation ≤30°, ≤60°, and ≤90°, respectively, and prospective risk of long-term sickness

absence. The X-axis represents the range of reallocations between; composition A:  $>30^\circ$  and  $\leq 30^\circ$ , composition B:  $>60^\circ$  and  $\leq 60^\circ$ , and composition C:  $>90^\circ$  and  $\leq 90^\circ$ ; in upright position. Y-axis indicates the ratio of the hazards associated with the new reallocated composition and reference composition (average composition). "0" on y axis represents risk associated with reference average composition. The displayed association looks non-linear for panel " $>90^\circ$ ". This is because when linear equations are performed on ilrs (the transformed composition A, B or C) and the results are then anti-logged, the results appear to be non-linear (1).

1. Dumuid D, Pedišić Ž, Palarea-Albaladejo J, Martín-Fernández JA, Hron K, Olds T. Compositional Data Analysis in Time-Use Epidemiology: What, Why, How. *Int J Environ Res Public Health*. 2020 Mar 26;17(7).
